# Supplementary material
Source: PubMed Central journal article supplement (PMC2902286)
Supplement: ddn121_1.pdf [file ddn121_1.pdf]

Supplemental Table 1. All Association Results in European American Samples

| Gene  | Marker     | All   |          |       | Positive Family History |          |       | Negative Family History |          |       |
|-------|------------|-------|----------|-------|-------------------------|----------|-------|-------------------------|----------|-------|
|       |            | PDT   | Geno-PDT | APL   | PDT                     | Geno-PDT | APL   | PDT                     | Geno-PDT | APL   |
| Wnt3A | rs708111   | 0.103 | 0.257    | 0.778 | 0.11                    | 0.114    | 0.366 | 0.558                   | 0.203    | 0.867 |
| Wnt3A | rs708114   | 0.340 | 0.555    | 0.55  | 0.217                   | 0.315    | 0.556 | 0.931                   | 0.919    | 0.778 |
| Wnt3A | rs3094912  | 0.485 | 0.335    | 0.698 | 0.778                   | 0.657    | 0.723 | 0.455                   | 0.449    | 0.75  |
| Wnt3A | rs3121310  | 0.014 | 0.033    | 0.065 | 0.051                   | 0.073    | 0.499 | 0.137                   | 0.319    | 0.08  |
| Wnt3A | rs752107   | 0.023 | 0.027    | 0.003 | 0.31                    | 0.441    | 0.125 | 0.0178                  | 0.027    | 0.009 |
| Wnt3A | rs1745420  | 0.024 | 0.034    | 0.092 | 0.301                   | 0.377    | 0.283 | 0.033                   | 0.067    | 0.204 |
| Wnt7A | rs1124480  | 0.528 | 0.667    | 0.681 | 0.842                   | 0.853    | 0.957 | 0.439                   | 0.603    | 0.539 |
| Wnt7A | rs9840696  | 0.229 | 0.473    | 0.958 | 0.040                   | 0.097    | 0.047 | 0.288                   | 0.584    | 0.149 |
| Wnt7A | rs6778046  | 0.127 | 0.162    | 0.407 | 0.03                    | 0.031    | 0.067 | 0.612                   | 0.888    | 0.670 |
| Wnt7A | rs9863149  | 0.176 | 0.366    | 0.784 | 0.038                   | 0.058    | 0.205 | 0.846                   | 0.687    | 0.608 |
| Wnt7A | rs934450   | 0.2   | 0.341    | 0.889 | 0.053                   | 0.029    | 0.168 | 0.673                   | 0.34     | 0.384 |
| Wnt7A | rs1433354  | 0.319 | 0.535    | 0.622 | 0.167                   | 0.254    | 0.322 | 0.831                   | 0.827    | 0.728 |
| Wnt7A | rs6442414  | 0.733 | 0.168    | 0.933 | 0.371                   | 0.34     | 0.833 | 0.598                   | 0.278    | 0.720 |
| Wnt7A | rs11128663 | 0.399 | 0.526    | 0.886 | 0.633                   | 0.416    | 0.897 | 0.455                   | 0.745    | 0.793 |
| Wnt7A | rs4685048  | 0.027 | 0.085    | 0.097 | 0.129                   | 0.351    | 0.152 | 0.105                   | 0.192    | 0.291 |
| Wnt5A | D3S3719    | 0.343 | 0.365    | n/a   | 0.343                   | 0.365    | n/a   | n/a                     | n/a      | n/a   |
| Wnt5A | rs566926   | 0.005 | 0.016    | 0.004 | 0.043                   | 0.107    | 0.049 | 0.0462                  | 0.144    | 0.02  |
| Wnt5A | D3S2408    | 0.599 | 0.286    | n/a   | 0.599                   | 0.286    | n/a   | n/a                     | n/a      | n/a   |

|       |            |       |       |       |       |       |       |         |         |       |
|-------|------------|-------|-------|-------|-------|-------|-------|---------|---------|-------|
| Wnt8a | rs4835761  | 0.399 | 0.069 | 0.46  | 0.561 | 0.265 | 0.194 | 0.067   | 0.086   | 0.129 |
| Wnt8a | rs2040862  | 0.352 | 0.055 | 0.061 | 0.581 | 0.372 | 0.085 | 0.009   | 0.016   | 0.001 |
| Wnt8a | rs2306110  | 0.409 | 0.188 | 0.818 | 0.749 | 0.679 | 0.052 | 0.117   | 0.113   | 0.197 |
| Wnt11 | rs663746   | 0.067 | 0.001 | 0.449 | 0.104 | 0.047 | 0.278 | 0.36139 | 0.01449 | 0.849 |
| Wnt11 | rs1533763  | 0.267 | 0.464 | 0.338 | 0.858 | 0.245 | 0.193 | 0.05    | 0.097   | 0.053 |
| Wnt11 | rs1533767  | 0.114 | 0.012 | 0.001 | 0.744 | 0.010 | 0.100 | 0.006   | 0.016   | 0.003 |
| Wnt11 | rs689095   | 0.374 | 0.127 | 0.540 | 0.943 | 0.217 | 0.652 | 0.135   | 0.219   | 0.289 |
| Wnt11 | rs596339   | 0.463 | 0.762 | 0.152 | 0.244 | 0.499 | 0.236 | 0.927   | 0.891   | 0.311 |
| Wnt11 | rs1568507  | 0.144 | 0.143 | 0.213 | 1.000 | 0.181 | 0.462 | 0.02    | 0.062   | 0.047 |
| Wnt3  | rs142167   | 0.108 | 0.23  | 0.051 | 0.294 | 0.553 | 0.107 | 0.190   | 0.359   | 0.222 |
| Wnt3  | rs7216231  | 0.662 | 0.289 | 0.714 | 0.162 | 0.162 | 0.092 | 0.394   | 0.477   | 0.315 |
| Wnt3  | rs199525   | 0.437 | 0.731 | 0.182 | 0.309 | 0.557 | 0.017 | 0.908   | 0.985   | 0.777 |
| Wnt3  | rs70602    | 0.154 | 0.308 | 0.041 | 0.309 | 0.585 | 0.009 | 0.299   | 0.426   | 0.365 |
| Wnt3  | rs199501   | 0.102 | 0.188 | 0.049 | 0.149 | 0.281 | 0.026 | 0.431   | 0.642   | 0.366 |
| Wnt3  | rs199498   | 0.162 | 0.239 | 0.161 | 0.087 | 0.139 | 0.006 | 1.000   | 0.941   | 0.947 |
| Wnt3  | rs111769   | 0.435 | 0.334 | 0.993 | 0.150 | 0.296 | 0.251 | 0.502   | 0.043   | 0.422 |
| Wnt3  | rs3851781  | 0.736 | 0.187 | 0.604 | 0.534 | 0.206 | 0.722 | 0.772   | 0.746   | 0.791 |
| Wnt3  | hCV1139279 | 0.217 | 0.366 | 0.597 | 0.278 | 0.335 | 0.808 | 0.535   | 0.801   | 0.689 |
| Wnt3  | rs9890413  | 0.948 | 0.698 | 0.593 | 0.932 | 0.216 | 0.504 | 0.840   | 0.005   | 0.835 |
| Wnt9B | rs2165846  | 0.697 | 0.887 | 0.715 | 0.381 | 0.556 | 0.668 | 0.538   | 0.771   | 0.403 |
| Wnt9B | rs1530364  | 0.574 | 0.828 | 0.644 | 0.083 | 0.146 | 0.298 | 1.000   | 0.821   | 0.856 |
| Wnt9B | rs197915   | 0.160 | 0.051 | 0.573 | 0.072 | 0.180 | 0.003 | 0.926   | 0.060   | 0.310 |

Supplemental Table 2. All Association Results in Hispanic Samples

| Gene  | Marker     | All   |          |       | Positive Family History |          |       | Negative Family History |          |       |
|-------|------------|-------|----------|-------|-------------------------|----------|-------|-------------------------|----------|-------|
|       |            | PDT   | Geno-PDT | APL   | PDT                     | Geno-PDT | APL   | PDT                     | Geno-PDT | APL   |
| Wnt3A | rs708111   | 0.858 | 0.698    | 0.314 | 0.034                   | 0.135    | 0.007 | 0.297                   | 0.426    | 0.005 |
| Wnt3A | rs708114   | 0.819 | 0.925    | 0.422 | 0.655                   | 0.513    | 0.813 | 0.593                   | 0.701    | 0.425 |
| Wnt3A | rs3094912  | 0.343 | 0.572    | 0.031 | 0.796                   | 0.892    | 0.301 | 0.162                   | 0.240    | 0.001 |
| Wnt3A | rs3121310  | 0.450 | 0.570    | 0.473 | 0.739                   | 0.264    | 0.867 | 0.251                   | 0.556    | 0.349 |
| Wnt3A | rs752107   | 0.695 | 0.744    | 0.082 | 0.706                   | 0.853    | 0.100 | 0.491                   | 0.280    | 0.261 |
| Wnt3A | rs1745420  | 0.083 | 0.157    | 0.001 | 0.096                   | 0.264    | 0.009 | 0.346                   | 0.376    | 0.008 |
| Wnt7A | rs1124480  | 0.106 | 0.040    | 0.252 | 0.706                   | 0.080    | 0.851 | 0.103                   | 0.189    | 0.118 |
| Wnt7A | rs9840696  | 0.876 | 0.747    | 0.336 | 1.000                   | 0.755    | 0.810 | 0.847                   | 0.925    | 0.330 |
| Wnt7A | rs6778046  | 0.886 | 0.026    | 0.110 | 0.763                   | 0.467    | 0.979 | 0.746                   | 0.044    | 0.084 |
| Wnt7A | rs9863149  | 0.858 | 0.576    | 0.911 | 0.796                   | 0.801    | 0.100 | 1.000                   | 0.625    | 0.133 |
| Wnt7A | rs934450   | 0.866 | 0.429    | 0.531 | 0.439                   | 0.714    | 0.090 | 0.655                   | 0.456    | 0.017 |
| Wnt7A | rs1433354  | 0.456 | 0.689    | 0.214 | 0.257                   | 0.411    | 0.651 | 0.746                   | 0.946    | 0.227 |
| Wnt7A | rs6442414  | 0.724 | 0.386    | 0.440 | 0.414                   | 0.641    | 0.508 | 1.000                   | 0.450    | 0.867 |
| Wnt7A | rs11128663 | 0.194 | 0.345    | 0.892 | 0.706                   | 0.641    | 0.943 | 0.209                   | 0.258    | 0.914 |
| Wnt7A | rs4685048  | 0.131 | 0.182    | 0.337 | 1.000                   | 1.000    | 0.800 | 0.096                   | 0.122    | 0.330 |
| Wnt5A | D3S3719    | 0.734 | 0.526    | n/a   | 0.734                   | 0.526    | n/a   | n/a                     | n/a      | n/a   |
| Wnt5A | rs566926   | 0.182 | 0.432    | 0.154 | 0.781                   | 0.185    | 0.401 | 0.144                   | 0.129    | 0.242 |
| Wnt5A | D3S2408    | 0.459 | 0.526    | n/a   | 0.459                   | 0.526    | n/a   | n/a                     | n/a      | n/a   |

|       |            |       |       |       |       |       |       |       |       |       |
|-------|------------|-------|-------|-------|-------|-------|-------|-------|-------|-------|
| Wnt8a | rs4835761  | 0.695 | 0.814 | 0.251 | 0.763 | 0.837 | 0.507 | 0.796 | 0.925 | 0.360 |
| Wnt8a | rs2040862  | 0.637 | 0.783 | 0.636 | 0.157 | 0.157 | 0.260 | 1.000 | 1.000 | 0.850 |
| Wnt8a | rs2306110  | 0.564 | 0.650 | 0.181 | 0.763 | 0.837 | 0.524 | 0.617 | 0.758 | 0.223 |
| Wnt11 | rs663746   | 1.000 | 0.031 | 0.245 | 0.025 | 0.104 | 0.282 | 0.336 | 0.080 | 0.081 |
| Wnt11 | rs1533763  | 0.366 | 0.608 | 0.622 | 0.564 | 0.564 | 0.323 | 0.480 | 0.683 | 0.924 |
| Wnt11 | rs1533767  | 0.637 | 0.701 | 0.900 | 0.414 | 0.414 | 0.997 | 1.000 | 0.585 | 0.867 |
| Wnt11 | rs689095   | 1.000 | 1.000 | 0.851 | 0.157 | 0.264 | 0.469 | 0.593 | 0.467 | 0.915 |
| Wnt11 | rs596339   | 0.134 | 0.131 | 0.370 | 1.000 | 1.000 | 0.456 | 0.083 | 0.116 | 0.204 |
| Wnt11 | rs1568507  | 0.617 | 0.659 | 0.971 | 0.317 | 0.513 | 0.894 | 0.439 | 0.301 | 0.911 |
| Wnt3  | rs142167   | 0.866 | 0.953 | 0.730 | 0.480 | 0.367 | 0.463 | 0.847 | 0.642 | 0.943 |
| Wnt3  | rs7216231  | 0.353 | 0.492 | 0.989 | 0.257 | 0.135 | 0.983 | 0.670 | 0.210 | 0.993 |
| Wnt3  | rs199525   | 0.531 | 0.678 | 0.997 | 0.317 | 0.317 | 0.194 | 0.670 | 0.627 | 0.943 |
| Wnt3  | rs70602    | 0.617 | 0.607 | 0.658 | 0.317 | 0.317 | 0.190 | 0.796 | 0.445 | 0.750 |
| Wnt3  | rs199501   | 0.465 | 0.696 | 0.495 | 0.706 | 0.641 | 0.683 | 0.532 | 0.546 | 0.369 |
| Wnt3  | rs199498   | 0.414 | 0.376 | 0.531 | 0.706 | 0.641 | 0.688 | 0.467 | 0.155 | 0.410 |
| Wnt3  | rs111769   | 0.847 | 0.946 | 0.358 | 0.317 | 0.513 | 0.073 | 1.000 | 0.798 | 0.442 |
| Wnt3  | rs3851781  | 0.414 | 0.758 | 0.676 | 1.000 | 1.000 | 0.037 | 0.394 | 0.741 | 0.440 |
| Wnt3  | hCV1139279 | 0.593 | 0.695 | 0.810 | 0.564 | 0.564 | 0.309 | 0.366 | 0.578 | 0.492 |
| Wnt3  | rs9890413  | 0.683 | 0.908 | 0.980 | 0.157 | 0.157 | 0.145 | 1.000 | 0.722 | 0.851 |
| Wnt9B | rs2165846  | 0.127 | 0.204 | 0.755 | 0.564 | 0.564 | 0.040 | 0.059 | 0.155 | 0.369 |
| Wnt9B | rs1530364  | 0.480 | 0.685 | 0.740 | 0.414 | 0.641 | 0.982 | 0.695 | 0.766 | 0.677 |
| Wnt9B | rs197915   | 0.034 | 0.050 | 0.082 | 0.317 | 0.317 | 0.204 | 0.020 | 0.040 | 0.044 |

Supplemental Table 3. Linkage disequilibrium data ( $r^2$ ) for dbSNPs from 7 Wnt genes. European American results are listed below the diagonal; Hispanic results are listed above the diagonal.

a) Wnt3A

b) Wnt7A

c) Wnt5A

d) Wnt8A

e) Wnt11

f) Wnt3

g) Wnt9B

a) Wnt3A

|           | rs708111 | rs708114 | rs3094912 | rs3121310 | rs752107 | rs1745420 |
|-----------|----------|----------|-----------|-----------|----------|-----------|
| rs708111  |          | 0.027    | 0.688     | 0.021     | 0.176    | 0.157     |
| rs708114  | 0.289    |          | 0.001     | 0.463     | 0.012    | 0.001     |
| rs3094912 | 0.561    | 0.040    |           | 0.004     | 0.217    | 0.190     |
| rs3121310 | 0.137    | 0.484    | 0.013     |           | 0.014    | 0.014     |
| rs752107  | 0.195    | 0.030    | 0.282     | 0.054     |          | 0.005     |
| rs1745420 | 0.082    | 0.010    | 0.135     | 0.000     | 0.046    |           |

b) Wnt7A

|            | rs1124480 | rs9840696 | rs6778046 | rs9863149 | rs934450 | rs1433354 | rs6442414 | rs11128663 | rs4685048 |
|------------|-----------|-----------|-----------|-----------|----------|-----------|-----------|------------|-----------|
| rs1124480  |           | 0.024     | 0.030     | 0.003     | 0.004    | 0.014     | 0.006     | 0.003      | 0.001     |
| rs9840696  | 0.087     |           | 0.731     | 0.111     | 0.155    | 0.239     | 0.023     | 0.008      | 0.014     |
| rs6778046  | 0.065     | 0.799     |           | 0.193     | 0.239    | 0.252     | 0.044     | 0.003      | 0.026     |
| rs9863149  | 0.037     | 0.214     | 0.244     |           | 0.679    | 0.001     | 0.001     | 0.013      | 0.002     |
| rs934450   | 0.032     | 0.219     | 0.263     | 0.900     |          | 0.011     | 0.003     | 0.004      | 0.001     |
| rs1433354  | 0.004     | 0.142     | 0.158     | 0.002     | 0.000    |           | 0.085     | 0.033      | 0.029     |
| rs6442414  | 0.000     | 0.014     | 0.015     | 0.075     | 0.084    | 0.008     |           | 0.598      | 0.369     |
| rs11128663 | 0.001     | 0.000     | 0.000     | 0.015     | 0.019    | 0.021     | 0.533     |            | 0.487     |
| rs4685048  | 0.010     | 0.015     | 0.012     | 0.018     | 0.022    | 0.115     | 0.322     | 0.526      |           |

c) Wnt5A

|          | D3S3719                                                                           | rs566926                                                                          | D3S2408                                                                           |
|----------|-----------------------------------------------------------------------------------|-----------------------------------------------------------------------------------|-----------------------------------------------------------------------------------|
| D3S3719  |  | 0.000                                                                             | 0.000                                                                             |
| rs566926 | 0.000                                                                             |  | 0.000                                                                             |
| D3S2408  | 0.000                                                                             | 0.000                                                                             |  |



d) Wnt8A

|           | rs4835761  | rs2040862  | rs2306110  |
|-----------|------------|------------|------------|
| rs4835761 | [REDACTED] | 0.081      | 0.935      |
| rs2040862 | 0.128      | [REDACTED] | 0.079      |
| rs2306110 | 0.932      | 0.118      | [REDACTED] |

e) Wnt11

|           | rs663746 | rs1533763 | rs1533767 | rs689095 | rs596339 | rs1568507 |
|-----------|----------|-----------|-----------|----------|----------|-----------|
| rs663746  |          | 0.000     | 0.044     | 0.009    | 0.000    | 0.007     |
| rs1533763 | 0.026    |           | 0.004     | 0.094    | 0.296    | 0.092     |
| rs1533767 | 0.108    | 0.018     |           | 0.021    | 0.004    | 0.017     |
| rs689095  | 0.023    | 0.120     | 0.058     |          | 0.327    | 0.948     |
| rs596339  | 0.027    | 0.445     | 0.017     | 0.232    |          | 0.318     |
| rs1568507 | 0.012    | 0.114     | 0.047     | 0.885    | 0.237    |           |

f) Wnt3

|            | rs142167 | rs7216231 | rs199525 | rs70602 | rs199501 | rs199498 | rs111769 | rs3851781 | hCV1139279 | rs9890413 |
|------------|----------|-----------|----------|---------|----------|----------|----------|-----------|------------|-----------|
| rs142167   |          | 0.471     | 0.101    | 0.160   | 0.797    | 0.738    | 0.015    | 0.018     | 0.037      | 0.000     |
| rs7216231  | 0.065    |           | 0.102    | 0.129   | 0.428    | 0.293    | 0.113    | 0.039     | 0.031      | 0.040     |
| rs199525   | 0.581    | 0.004     |          | 0.718   | 0.096    | 0.130    | 0.255    | 0.153     | 0.010      | 0.082     |
| rs70602    | 0.638    | 0.003     | 0.767    |         | 0.149    | 0.144    | 0.243    | 0.124     | 0.002      | 0.126     |
| rs199501   | 0.798    | 0.063     | 0.621    | 0.765   |          | 0.769    | 0.021    | 0.000     | 0.023      | 0.001     |
| rs199498   | 0.673    | 0.003     | 0.640    | 0.716   | 0.731    |          | 0.009    | 0.032     | 0.031      | 0.015     |
| rs111769   | 0.029    | 0.002     | 0.025    | 0.026   | 0.024    | 0.025    |          | 0.095     | 0.045      | 0.209     |
| rs3851781  | 0.064    | 0.001     | 0.074    | 0.082   | 0.074    | 0.098    | 0.018    |           | 0.152      | 0.343     |
| hCV1139279 | 0.001    | 0.001     | 0.006    | 0.005   | 0.003    | 0.004    | 0.128    | 0.163     |            | 0.037     |
| rs9890413  | 0.030    | 0.002     | 0.040    | 0.039   | 0.031    | 0.045    | 0.165    | 0.361     | 0.120      |           |

g) Wnt9B

|           | rs2165846  | rs1530364  | rs197915   |
|-----------|------------|------------|------------|
| rs2165846 | [REDACTED] | 0.018      | 0.062      |
| rs1530364 | 0.030      | [REDACTED] | 0.124      |
| rs197915  | 0.082      | 0.069      | [REDACTED] |
